# Supplementary material for: From Pathways to Practice: Impact of Implementing Mobilization Recommendations in Head and Neck Cancer Surgery with Free Flap Reconstruction
Source: MDPI journal article supplement (doi:10.3390/cancers13122890), 2021-06-09
Supplement: s1 [file s1]

**Table S1.** Improved compliance and time to postoperative mobilization with the recommendation after the mobilization recommendation was introduced. Fisher's exact tests were used for *p*-values, except for mobilization (\*Mann Whitney Test).

|                                  | All cases<br><i>n</i> =445 | Before<br><i>n</i> =164 | After<br><i>n</i> =281 | Odds ratio (95% CI) | <i>p</i> -value   |
|----------------------------------|----------------------------|-------------------------|------------------------|---------------------|-------------------|
| <b>Compliance</b>                |                            |                         |                        |                     |                   |
| Yes                              | 267 (60)                   | 88 (54)                 | 179 (64)               | 1.52 (1.00-2.28)    | <b>0.045</b>      |
| No                               | 178 (40)                   | 76 (46)                 | 102 (36)               |                     |                   |
| <b>Mobilized within 24 hours</b> |                            |                         |                        |                     |                   |
| Yes                              | 196 (44)                   | 17 (10)                 | 179 (64)               | 15.2 (8.5-28.4)     | <b>&lt;0.001</b>  |
| No                               | 249 (56)                   | 147 (90)                | 102 (36)               |                     |                   |
| <b>Mobilized within 48 hours</b> |                            |                         |                        |                     |                   |
| Yes                              | 342 (77)                   | 88 (54)                 | 254 (90)               | 8.1 (4.8-13.9)      | <b>&lt;0.001</b>  |
| No                               | 103 (23)                   | 76 (46)                 | 27 (10)                |                     |                   |
| <b>Mobilized within 72 hours</b> |                            |                         |                        |                     |                   |
| Yes                              | 405 (91)                   | 136 (83)                | 269 (96)               | 4.6 (2.2-10.3)      | <b>&lt;0.001</b>  |
| No                               | 40 (9)                     | 28 (17)                 | 12 (4)                 |                     |                   |
| <b>Time to mobilization</b>      |                            |                         |                        |                     |                   |
| Mean ± SD                        | 2.2 ± 2.5                  | 2.9 ± 2.0               | 1.7 ± 2.6              | <i>z</i> = 11.48    | <b>&lt;0.001*</b> |
| Median (IQR)                     | 2 (1-2)                    | 2 (2-3)                 | 1 (1-2)                |                     |                   |

**Table S2.** Logistic regression analysis (controlling for alcohol) of compliance with guideline concordant care, postoperative complications, and length of stay. The reference level for odds ratios is indicated with *italics*.

| Characteristic            | All cases  | Compliance=Yes | Compliance=No | OR   | 95% CI    | <i>p</i> -value |
|---------------------------|------------|----------------|---------------|------|-----------|-----------------|
| <i>n</i> (%)              | 445 (100)  | 267 (60)       | 178 (40)      |      |           |                 |
| <b>Major complication</b> |            |                |               |      |           |                 |
| Yes                       | 70 (15.8)  | 29 (10.9)      | 39 (21.9)     | 0.44 | 0.25-0.76 | <b>0.004</b>    |
| No                        | 374 (84.2) | 238 (89.1)     | 123 (69.1)    |      |           |                 |
| <b>Pneumonia</b>          |            |                |               |      |           |                 |
| Yes                       | 37 (8.3)   | 15 (5.6)       | 22 ()         | 0.35 | 0.16-0.75 | <b>0.007</b>    |
| No                        | 408 (91.7) | 252 (94.4)     | 156 ()        |      |           |                 |
| <b>Length of stay</b>     |            |                |               |      |           |                 |
| POD 0-10                  | 204 (46)   | 131 (49.1)     | 109 (61.6)    | 0.58 | 0.38-0.59 | <b>0.013</b>    |
| After POD 10              | 240 (54)   | 136 (50.9)     | 68 (38.4)     |      |           |                 |

**Table S3.** Predictors of major complications using elastic net regularization followed by multivariable logistic regression. Mobilization (within 48 hours) substituted for compliance with guideline-recommended mobilization.

| <b>Characteristic</b><br>(reference level) | <b>Major complications</b> |               |          |                |
|--------------------------------------------|----------------------------|---------------|----------|----------------|
|                                            | <b>Odds ratio</b>          | <b>95% CI</b> | <b>z</b> | <b>p-value</b> |
| <b>Age</b> (centred at the mean)           | 1.01                       | 0.98-1.04     | 0.56     | 0.558          |
| <b>BMI category</b> (healthy range)        |                            |               |          |                |
| Underweight                                | 1.93                       | 0.57-6.54     | 1.05     | 0.293          |
| Overweight                                 | 0.44                       | 0.19-1.02     | -1.91    | 0.056          |
| Obese                                      | 0.74                       | 0.32-1.73     | -0.69    | 0.493          |
| <b>Sex</b> (male)                          |                            |               |          |                |
| Female                                     | 0.70                       | 0.33-1.50     | -0.91    | 0.362          |
| <b>Smoking Status</b> (never)              |                            |               |          |                |
| Former smoker                              | 0.57                       | 0.24-1.35     | -1.28    | 0.201          |
| Current smoker                             | 0.23                       | 0.08-0.65     | -2.74    | <b>0.006</b>   |
| <b>Alcohol status</b> (never)              |                            |               |          |                |
| Light/Moderate                             | 1.86                       | 0.75-4.61     | -1.34    | 0.181          |
| Heavy                                      | 1.32                       | 0.40-4.32     | 0.46     | 0.645          |
| Former drinker                             | 0.52                       | 0.12-2.27     | -0.87    | 0.383          |
| <b>Comorbidity</b> (none)                  |                            |               |          |                |
| One                                        | 1.41                       | 0.57-3.49     | 0.74     | 0.460          |
| Two or more                                | 2.64                       | 1.14-6.15     | 2.25     | <b>0.024</b>   |
| <b>Primary Site</b> (oral cavity)          |                            |               |          |                |
| Pharynx & Larynx                           | 1.42                       | 0.49-4.07     | 0.65     | 0.516          |
| Paranasal/Nasal                            | 0.31                       | 0.05-1.81     | -1.30    | 0.192          |
| Skin                                       | 0.17                       | 0.01-1.90     | -1.44    | 0.150          |
| Other                                      | 0.32                       | 0.05-1.92     | -1.25    | 0.212          |
| <b>Cancer stage</b> (I-II)                 |                            |               |          |                |
| III-IV                                     | 2.29                       | 0.96-5.48     | 1.86     | 0.063          |
| <b>Flap type</b> (radial forearm)          |                            |               |          |                |
| Fibula                                     | 1.28                       | 0.52-3.14     | 0.53     | 0.597          |
| Anterolateral thigh                        | 1.39                       | 0.45-4.29     | 0.57     | 0.566          |
| Other                                      | 2.80                       | 1.12-7.01     | 2.20     | <b>0.028</b>   |
| <b>Unit arrival</b> (POD 0-1)              |                            |               |          |                |
| After POD 1                                | 2.62                       | 1.17-5.87     | 2.33     | <b>0.020</b>   |
| <b>Compliance</b> (no)                     |                            |               |          |                |
| Yes                                        | 0.57                       | 0.29-1.13     | -1.62    | <b>0.106</b>   |
| <b>Tracheostomy</b> (no)                   |                            |               |          |                |
| Yes                                        | 0.38                       | 1.13-1.07     | -1.83    | <b>0.067</b>   |

**Table S4.** Predictors of hospital length of stay using elastic net regularization followed by multivariable logistic regression. Mobilization (within 48 hours) substituted for compliance with guideline-recommended mobilization.

| Characteristic<br>(reference level)        | Major complications |              |       |                  |
|--------------------------------------------|---------------------|--------------|-------|------------------|
|                                            | Odds ratio          | 95% CI       | z     | p-value          |
| <b>Age</b> (centred at the mean)           | 1.03                | 1.01-1.05    | 2.43  | <b>0.015</b>     |
| <b>BMI category</b> (healthy range)        |                     |              |       |                  |
| Underweight                                | 1.00                | 0.34-2.96    | -0.01 | 0.994            |
| Overweight                                 | 0.64                | 0.34-1.20    | -1.39 | 0.165            |
| Obese                                      | 0.48                | 0.23-0.98    | -2.02 | <b>0.043</b>     |
| <b>Alcohol status</b> (never)              |                     |              |       |                  |
| Light/Moderate                             | 0.58                | 0.29-1.17    | -1.51 | 0.130            |
| Heavy                                      | 0.80                | 0.35-1.78    | -0.56 | 0.577            |
| Former drinker                             | 2.37                | 0.90-6.21    | 1.75  | 0.081            |
| <b>Comorbidity</b> (none)                  |                     |              |       |                  |
| One                                        | 1.00                | 0.51-1.96    | 0.00  | 0.998            |
| Two or more                                | 1.50                | 0.75-3.01    | 1.14  | 0.253            |
| <b>Primary Site</b> (oral cavity)          |                     |              |       |                  |
| Pharynx & Larynx                           | 4.69                | 1.65-13.35   | 2.90  | <b>0.004</b>     |
| Paranasal/Nasal                            | 0.06                | 0.01-0.33    | -3.26 | <b>0.001</b>     |
| Skin                                       | 0.12                | 0.02-0.54    | -2.75 | <b>0.006</b>     |
| Other                                      | 0.73                | 0.19-2.76    | -0.46 | 0.646            |
| <b>Flap count</b> (one)                    |                     |              |       |                  |
| Two                                        | 0.21                | 0.01-6.44    | -0.89 | 0.375            |
| <b>Resection extent</b> (soft tissue only) |                     |              |       |                  |
| Bone                                       | 1.15                | 0.60-2.20    | 0.43  | 0.669            |
| Soft tissue & bone                         | 27.10               | 0.49-1493.71 | 1.61  | 0.107            |
| <b>Compliance</b> (no)                     |                     |              |       |                  |
| Yes                                        | 0.89                | 0.51-1.55    | -0.41 | <b>0.680</b>     |
| <b>Tracheostomy</b> (no)                   |                     |              |       |                  |
| Yes                                        | 3.03                | 1.21-7.60    | 2.36  | <b>0.018</b>     |
| <b>Any complication</b> (no)               |                     |              |       |                  |
| Yes                                        | 6.69                | 3.75-11.95   | 6.42  | <b>&lt;0.001</b> |
| <b>Major Complication</b> (no)             |                     |              |       |                  |
| Yes                                        | 2.29                | 0.91-5.76    | 1.76  | 0.079            |
